# Supplementary material for: LenSelect: Object Selection in Virtual Environments by Dynamic Object Scaling
Source: Frontiers journal article supplement (doi:10.3389/frvir.2021.684677), 2021-06-21
Supplement: Data_Sheet_1.PDF [file Data_Sheet_1.PDF]

Table 1

*Results of the Games-Howell post-hoc test for selection time.*

| Test Scene          | Group A        | Group B            | Mean Difference (A-B) | Standard Error | Significance | 95%-Confidence Interval |
|---------------------|----------------|--------------------|-----------------------|----------------|--------------|-------------------------|
| Propane Tanks Close | Expand         | IntenSelect        | 1.047s                | 0.057s         | < 0.001      | [0.935s, 1.158s]        |
|                     | Expand         | LenSelect Combined | 1.079s                | 0.057s         | < 0.001      | [0.968s, 1.191s]        |
|                     | Expand         | LenSelect Root     | 1.041s                | 0.057s         | < 0.001      | [0.929s, 1.152s]        |
|                     | Expand         | RaySelection       | 1.073s                | 0.056s         | < 0.001      | [0.962s, 1.183s]        |
| Propane Tanks Far   | Expand         | IntenSelect        | 1.313s                | 0.051s         | < 0.001      | [1.212s, 1.414s]        |
|                     | Expand         | LenSelect Combined | 1.390s                | 0.051s         | < 0.001      | [1.290s, 1.490s]        |
|                     | Expand         | LenSelect Root     | 1.310s                | 0.051s         | < 0.001      | [1.210s, 1.410s]        |
|                     | Expand         | RaySelection       | 1.318s                | 0.050s         | < 0.001      | [1.220s, 1.420s]        |
|                     | LenSelect Root | LenSelect Combined | 0.079s                | 0.019s         | 0.022        | [0.116s, 0.043s]        |
|                     | RaySelection   | LenSelect Combined | 0.072s                | 0.017s         | 0.02         | [0.105s, 0.039s]        |
| Rotating Spheres    | Expand         | IntenSelect        | 1.477s                | 0.06s          | < 0.001      | [1.359s, 1.596s]        |
|                     | Expand         | LenSelect Combined | 1.41s                 | 0.062s         | < 0.001      | [1.288s, 1.532s]        |
|                     | Expand         | LenSelect Root     | 1.477s                | 0.06s          | < 0.001      | [1.358s, 1.595s]        |
|                     | Expand         | RaySelection       | 1.316s                | 0.062s         | < 0.001      | [1.193s, 1.438s]        |
|                     | RaySelection   | IntenSelect        | 0.161s                | 0.025s         | < 0.001      | [0.211s, 0.112s]        |
|                     | RaySelection   | LenSelect Root     | 0.161s                | 0.025s         | < 0.001      | [0.210s, 0.112s]        |
| Miscellaneous       | Expand         | IntenSelect        | 1.624s                | 0.052s         | < 0.001      | [1.523s, 1.726s]        |
|                     | Expand         | LenSelect Combined | 1.636s                | 0.052s         | < 0.001      | [1.534s, 1.738s]        |
|                     | Expand         | LenSelect Root     | 0.051s                | 0.051s         | < 0.001      | [1.527s, 1.726s]        |
|                     | Expand         | RaySelection       | 1.583s                | 0.051s         | < 0.001      | [1.483s, 1.683s]        |
| Erratic Spheres     | Expand         | IntenSelect        | 1.370s                | 0.079s         | < 0.001      | [1.215s, 1.526s]        |
|                     | Expand         | LenSelect Combined | 1.432s                | 0.078s         | < 0.001      | [1.278s, 1.587s]        |

|                |                    |                    |        |         |         |                  |
|----------------|--------------------|--------------------|--------|---------|---------|------------------|
|                | Expand             | LenSelect Root     | 1.413s | 0.080s  | < 0.001 | [1.255s, 1.571s] |
|                | Expand             | RaySelection       | 1.198s | 0.083s  | < 0.001 | [1.035s, 1.362s] |
|                | RaySelection       | LenSelect Combined | 0.234s | 0.052s  | 0.014   | [0.337s, 0.131s] |
|                | RaySelection       | LenSelect Root     | 0.215s | 0.055s  | 0.047   | [0.323s, 0.106s] |
| Fast Sphere    | Expand             | IntenSelect        | 1.354s | 0.044s  | < 0.001 | [1.268s, 1.441s] |
|                | Expand             | LenSelect Combined | 1.168s | 0.049s  | < 0.001 | [1.071s, 1.266s] |
|                | Expand             | LenSelect Root     | 1.139s | 0.051s  | < 0.001 | [1.039s, 1.240s] |
|                | Expand             | RaySelection       | 0.666s | 0.0670s | < 0.001 | [0.534s, 0.798s] |
|                | LenSelect Combined | IntenSelect        | 0.186s | 0.036s  | 0.003   | [0.258s, 0.114s] |
|                | LenSelect Root     | IntenSelect        | 0.215s | 0.039s  | < 0.001 | [0.291s, 0.139s] |
|                | RaySelection       | IntenSelect        | 0.688s | 0.058s  | < 0.001 | [0.802s, 0.574s] |
|                | RaySelection       | LenSelect Combined | 0.502s | 0.062s  | < 0.001 | [0.625s, 0.379s] |
|                | RaySelection       | LenSelect Root     | 0.473s | 0.064s  | < 0.001 | [0.598s, 0.347s] |
| Stacked Cubes  | Expand             | IntenSelect        | 1.049s | 0.038   | < 0.001 | [0.974s, 1.124s] |
|                | Expand             | LenSelect Combined | 1.021s | 0.038s  | < 0.001 | [0.946s, 1.096s] |
|                | Expand             | LenSelect Root     | 0.996s | 0.038s  | < 0.001 | [0.921s, 1.071s] |
|                | Expand             | RaySelection       | 1.071s | 0.037s  | < 0.001 | [0.998s, 1.144s] |
|                | LenSelect Root     | RaySelection       | 0.075s | 0.016s  | 0.006   | [0.045s, 0.106s] |
| Cluttered Cans | Expand             | IntenSelect        | 1.115s | 0.127s  | < 0.001 | [0.866s, 1.365s] |
|                | Expand             | LenSelect Combined | 1.521s | 0.077s  | < 0.001 | [1.368s, 1.673s] |
|                | Expand             | LenSelect Root     | 1.514s | 0.074s  | < 0.001 | [1.368s, 1.659s] |
|                | Expand             | RaySelection       | 1.445s | 0.080s  | < 0.001 | [1.288s, 1.602s] |
| Rotating Cans  | Expand             | IntenSelect        | 0.603s | 0.152s  | 0.041   | [0.304s, 0.902s] |
|                | Expand             | LenSelect Combined | 1.272s | 0.088s  | < 0.001 | [1.097s, 1.446s] |
|                | Expand             | LenSelect Root     | 1.222s | 0.093s  | < 0.001 | [1.039s, 1.405s] |
|                | Expand             | RaySelection       | 1.196s | 0.092s  | < 0.001 | [1.015s, 1.378s] |

|             |                       |        |        |       |                  |
|-------------|-----------------------|--------|--------|-------|------------------|
| IntenSelect | LenSelect<br>Combined | 0.669s | 0.130s | 0.003 | [0.412s, 0.925s] |
| IntenSelect | LenSelect<br>Root     | 0.619s | 0.133s | 0.010 | [0.356s, 0.882s] |
| IntenSelect | RaySelection          | 0.593s | 0.133s | 0.015 | [0.331s, 0.855s] |

Table 2

*Results of the Games-Howell post-hoc test for ID.*

| Test Scene             | Group A               | Group B               | Mean<br>Difference<br>(A-B) | Standard<br>Error | Significance | 95%-Confidence<br>Interval |
|------------------------|-----------------------|-----------------------|-----------------------------|-------------------|--------------|----------------------------|
| Propane<br>Tanks Close | Expand                | IntenSelect           | 1.558                       | 0.021             | <0.001       | [1.515, 1.600]             |
|                        | Expand                | LenSelect<br>Combined | 1.680                       | 0.021             | <0.001       | [1.637, 1.720]             |
|                        | Expand                | LenSelect<br>Root     | 1.828                       | 0.021             | <0.001       | [1.786, 1.869]             |
|                        | Expand                | RaySelection          | 1.126                       | 0.021             | <0.001       | [1.084, 1.168]             |
|                        | IntenSelect           | LenSelect<br>Combined | 0.121                       | 0.008             | <0.001       | [0.105, 0.137]             |
|                        | IntenSelect           | LenSelect<br>Root     | 0.270                       | 0.008             | <0.001       | [0.253, 0.286]             |
|                        | RaySelection          | IntenSelect           | 0.431                       | 0.008             | <0.001       | [-0.448, -0.414]           |
|                        | LenSelect<br>Combined | LenSelect<br>Root     | 0.149                       | 0.006             | <0.001       | [0.135, 0.161]             |
|                        | RaySelection          | LenSelect<br>Combined | 0.553                       | 0.006             | <0.001       | [-0.566, -0.539]           |
|                        | RaySelection          | LenSelect<br>Root     | 0.702                       | 0.007             | <0.001       | [-0.715, -0.687]           |
| Propane<br>Tanks Far   | Expand                | IntenSelect           | 1.513                       | 0.028             | <0.001       | [1.457, 1.569]             |
|                        | Expand                | LenSelect<br>Combined | 1.546                       | 0.029             | <0.001       | [1.487, 1.603]             |
|                        | Expand                | LenSelect<br>Root     | 1.080                       | 0.027             | <0.001       | [1.025, 1.134]             |
|                        | Expand                | RaySelection          | 0.373                       | 0.028             | <0.001       | [0.317, 0.428]             |
|                        | IntenSelect           | LenSelect<br>Root     | -0.433                      | 0.012             | <0.001       | [-0.457, -0.408]           |
|                        | IntenSelect           | RaySelection          | -1.141                      | 0.013             | <0.001       | [-1.167, -1.114]           |
|                        | LenSelect<br>Combined | LenSelect<br>Root     | -0.465                      | 0.014             | <0.001       | [-0.494, -0.435]           |
|                        | LenSelect<br>Combined | RaySelection          | -1.173                      | 0.015             | <0.001       | [-1.204, -1.141]           |
|                        | LenSelect<br>Root     | RaySelection          | -0.708                      | 0.012             | <0.001       | [-0.731, -0.683]           |

|                     |                       |                       |        |       |        |                  |
|---------------------|-----------------------|-----------------------|--------|-------|--------|------------------|
| Rotating<br>Spheres | Expand                | IntenSelect           | 2.736  | 0.035 | <0.001 | [2.665, 2.805]   |
|                     | Expand                | LenSelect<br>Combined | 1.536  | 0.037 | <0.001 | [1.462, 1.608]   |
|                     | Expand                | LenSelect<br>Root     | 1.725  | 0.038 | <0.001 | [1.649, 1.800]   |
|                     | Expand                | RaySelection          | 0.878  | 0.042 | <0.001 | [0.794, 0.962]   |
|                     | IntenSelect           | LenSelect<br>Combined | -1.200 | 0.017 | <0.001 | [-1.235, -1.164] |
|                     | IntenSelect           | LenSelect<br>Root     | -1.011 | 0.019 | <0.001 | [-1.050, -0.971] |
|                     | IntenSelect           | RaySelection          | -1.857 | 0.027 | <0.001 | [-1.911, -1.802] |
|                     | LenSelect<br>Combined | LenSelect<br>Root     | 0.189  | 0.022 | <0.001 | [0.144, 0.233]   |
|                     | LenSelect<br>Combined | RaySelection          | -0.657 | 0.029 | <0.001 | [-0.715, -0.599] |
|                     | LenSelect<br>Root     | RaySelection          | -0.846 | 0.030 | <0.001 | [-0.906, -0.786] |
| Miscellaneous       | Expand                | IntenSelect           | 1.749  | 0.054 | <0.001 | [1.642, 1.857]   |
|                     | Expand                | LenSelect<br>Combined | 1.883  | 0.050 | <0.001 | [1.784, 1.982]   |
|                     | Expand                | LenSelect<br>Root     | 1.878  | 0.051 | <0.001 | [1.776, 1.979]   |
|                     | Expand                | RaySelection          | 1.257  | 0.051 | <0.001 | [1.155, 1.358]   |
|                     | IntenSelect           | RaySelection          | -0.492 | 0.044 | <0.001 | [-0.580, -0.404] |
|                     | LenSelect<br>Combined | RaySelection          | -0.626 | 0.039 | <0.001 | [-0.703, -0.548] |
|                     | LenSelect<br>Root     | RaySelection          | -0.620 | 0.041 | <0.001 | [-0.702, -0.539] |
| Erratic<br>Spheres  | Expand                | IntenSelect           | 2.625  | 0.075 | <0.001 | [2.477, 2.773]   |
|                     | Expand                | LenSelect<br>Combined | 1.898  | 0.053 | <0.001 | [1.792, 2.005]   |
|                     | Expand                | LenSelect<br>Root     | 2.003  | 0.059 | <0.001 | [1.885, 2.121]   |
|                     | Expand                | RaySelection          | 1.132  | 0.053 | <0.001 | [1.025, 1.238]   |
|                     | IntenSelect           | LenSelect<br>Combined | -0.726 | 0.070 | <0.001 | [-0.864, -0.587] |
|                     | IntenSelect           | LenSelect<br>Root     | -0.621 | 0.075 | <0.001 | [-0.769, -0.473] |
|                     | IntenSelect           | RaySelection          | -1.492 | 0.070 | <0.001 | [-1.631, -1.354] |
|                     | LenSelect<br>Combined | RaySelection          | -0.766 | 0.047 | <0.001 | [-0.859, -0.674] |

|                |                    |                    |        |       |        |                  |
|----------------|--------------------|--------------------|--------|-------|--------|------------------|
|                | LenSelect Root     | RaySelection       | -0.871 | 0.053 | <0.001 | [-0.977, -0.765] |
| Fast Sphere    | Expand             | IntenSelect        | 2.897  | 0.046 | <0.001 | [2.805, 2.990]   |
|                | Expand             | LenSelect Combined | 1.629  | 0.054 | <0.001 | [1.521, 1.737]   |
|                | Expand             | LenSelect Root     | 1.601  | 0.056 | <0.001 | [1.490, 1.712]   |
|                | Expand             | RaySelection       | 0.687  | 0.063 | <0.001 | [0.562, 0.812]   |
|                | IntenSelect        | LenSelect Combined | -1.268 | 0.059 | <0.001 | [-1.385, -1.150] |
|                | IntenSelect        | LenSelect Root     | -1.296 | 0.060 | <0.001 | [-1.416, -1.176] |
|                | IntenSelect        | RaySelection       | -2.210 | 0.067 | <0.001 | [-2.343, -2.076] |
|                | LenSelect Combined | RaySelection       | -0.941 | 0.073 | <0.001 | [-1.086, -0.797] |
|                | LenSelect Root     | RaySelection       | -0.913 | 0.074 | <0.001 | [-1.060, -0.767] |
| Stacked Cubes  | Expand             | IntenSelect        | 1.513  | 0.030 | <0.001 | [1.453, 1.572]   |
|                | Expand             | LenSelect Combined | 1.470  | 0.019 | <0.001 | [1.430, 1.509]   |
|                | Expand             | LenSelect Root     | 1.592  | 0.018 | <0.001 | [1.555, 1.629]   |
|                | Expand             | RaySelection       | 1.036  | 0.019 | <0.001 | [0.997, 1.075]   |
|                | IntenSelect        | RaySelection       | -0.476 | 0.027 | <0.001 | [-0.531, -0.422] |
|                | LenSelect Combined | LenSelect Root     | 0.122  | 0.014 | <0.001 | [0.094, 0.150]   |
|                | LenSelect Combined | RaySelection       | -0.433 | 0.015 | <0.001 | [-0.464, -0.403] |
|                | LenSelect Root     | RaySelection       | -0.556 | 0.014 | <0.001 | [-0.584, -0.528] |
| Cluttered Cans | Expand             | IntenSelect        | 1.952  | 0.097 | <0.001 | [1.760, 2.14]    |
|                | Expand             | LenSelect Combined | 1.421  | 0.040 | <0.001 | [1.341, 1.501]   |
|                | Expand             | LenSelect Root     | 1.520  | 0.047 | <0.001 | [1.426, 1.614]   |
|                | Expand             | RaySelection       | 1.164  | 0.038 | <0.001 | [1.087, 1.240]   |
|                | IntenSelect        | LenSelect Combined | -0.530 | 0.099 | 0.001  | [-0.726, -0.335] |
|                | IntenSelect        | LenSelect Root     | -0.432 | 0.102 | 0.024  | [-0.633, -0.230] |
|                | IntenSelect        | RaySelection       | -0.788 | 0.098 | <0.001 | [-0.982, -0.594] |

|               |                    |                    |        |       |        |                  |
|---------------|--------------------|--------------------|--------|-------|--------|------------------|
|               | LenSelect Combined | RaySelection       | -0.257 | 0.042 | <0.001 | [-0.340, -0.174] |
|               | LenSelect Root     | RaySelection       | -0.356 | 0.049 | <0.001 | [-0.452, -0.259] |
| Rotating Cans | Expand             | IntenSelect        | 1.423  | 0.105 | <0.001 | [1.215, 1.631]   |
|               | Expand             | LenSelect Combined | 1.828  | 0.053 | <0.001 | [1.723, 1.932]   |
|               | Expand             | LenSelect Root     | 1.925  | 0.066 | <0.001 | [1.795, 2.055]   |
|               | Expand             | RaySelection       | 1.513  | 0.060 | <0.001 | [1.394, 1.632]   |
|               | IntenSelect        | LenSelect Root     | 0.502  | 0.115 | 0.001  | [0.275, 0.729]   |
|               | LenSelect Combined | RaySelection       | -0.314 | 0.065 | 0.024  | [-0.443, -0.185] |
|               | LenSelect Root     | RaySelection       | -0.412 | 0.076 | 0.001  | [-0.562, -0.261] |

Table 3

*Results of the Games-Howell post-hoc test for selection errors.*

| Test Scene       | Group A            | Group B            | Mean Difference (A-B) | Standard Error | Significance | 95%-Confidence Interval |
|------------------|--------------------|--------------------|-----------------------|----------------|--------------|-------------------------|
| Rotating Spheres | LenSelect Root     | LenSelect Root     | -0.195                | 0.049          | 0.029        | [-0.293, -0.096]        |
| Miscellaneous    | Expand             | IntenSelect        | 0.165                 | 0.026          | <0.001       | [0.112, 0.218]          |
|                  | Expand             | LenSelect Combined | 0.135                 | 0.028          | 0.007        | [0.079, 0.190]          |
|                  | Expand             | LenSelect Root     | 0.170                 | 0.026          | <0.001       | [0.118, 0.222]          |
| Erratic Spheres  | Expand             | RaySelection       | -0.220                | 0.055          | 0.041        | [-0.329, -0.110]        |
|                  | IntenSelect        | RaySelection       | -0.260                | 0.053          | 0.005        | [-0.364, -0.155]        |
| Fast Sphere      | Expand             | IntenSelect        | 0.130                 | 0.029          | 0.015        | [0.072, 0.187]          |
|                  | Expand             | RaySelection       | -0.730                | 0.078          | <0.001       | [-0.884, -0.575]        |
|                  | IntenSelect        | LenSelect Combined | -0.320                | 0.050          | <0.001       | [-0.420, -0.219]        |
|                  | IntenSelect        | LenSelect Root     | -0.290                | 0.055          | 0.002        | [-0.398, -0.181]        |
|                  | IntenSelect        | RaySelection       | -0.860                | 0.073          | <0.001       | [-1.004, -0.715]        |
|                  | LenSelect Combined | RaySelection       | -0.540                | 0.088          | <0.001       | [-0.714, -0.365]        |
|                  | LenSelect Root     | RaySelection       | -0.570                | 0.091          | <0.001       | [-0.749, -0.390]        |

|               |             |                       |        |       |       |                 |
|---------------|-------------|-----------------------|--------|-------|-------|-----------------|
| Rotating Cans | Expand      | IntenSelect           | -0.587 | 0.128 | 0.011 | [-0.840 -0.335] |
|               | IntenSelect | LenSelect<br>Combined | 0.552  | 0.119 | 0.010 | [0.316, 0.788]  |
|               | IntenSelect | LenSelect<br>Root     | 0.582  | 0.121 | 0.007 | [0.342, 0.822]  |
|               | IntenSelect | RaySelection          | 0.532  | 0.126 | 0.025 | [0.283, 0.781]  |

Table 4

*Results of the Tukey post-hoc test for fun, complexity, ques total and user ranking metrics.*

| Test Scene   | Group A     | Group B               | Mean<br>Difference<br>(A-B) | Standard<br>Error | Significance | 95%-Confidence<br>Interval |
|--------------|-------------|-----------------------|-----------------------------|-------------------|--------------|----------------------------|
| Fun          | Expand      | IntenSelect           | -1.100                      | 0.349             | 0.015        | [-2.070, -0.129]           |
|              | Expand      | LenSelect<br>Combined | -1.350                      | 0.349             | 0.001        | [-2.320, -0.379]           |
|              | Expand      | LenSelect<br>Root     | -1.190                      | 0.349             | 0.006        | [-2.170 -0.229]            |
|              | Expand      | RaySelection          | -1.350                      | 0.349             | 0.001        | [-2.320 -0.379]            |
| Complexity   | Expand      | IntenSelect           | 0.899                       | 0.300             | 0.024        | [0.066 1.733]              |
|              | Expand      | LenSelect<br>Combined | 1.650                       | 0.300             | <0.001       | [0.816, 2.483]             |
|              | Expand      | LenSelect<br>Root     | 1.400                       | 0.300             | <0.001       | [0.566, 2.233]             |
|              | Expand      | RaySelection          | 1.850                       | 0.300             | <0.001       | [1.016, 2.683]             |
|              | IntenSelect | RaySelection          | 0.950                       | 0.300             | 0.014        | [0.116, 1.783]             |
| Quesi Total  | Expand      | LenSelect<br>Combined | -1.070                      | 0.215             | <0.001       | [-1.670, -0.472]           |
|              | Expand      | LenSelect<br>Root     | -0.990                      | 0.215             | <0.001       | [-1.591, -0.393]           |
|              | Expand      | RaySelection          | -1.280                      | 0.215             | <0.001       | [-1.881, -0.683]           |
|              | IntenSelect | LenSelect<br>Combined | -0.730                      | 0.215             | 0.006        | [-1.338 -0.140]            |
|              | IntenSelect | LenSelect<br>Root     | -0.660                      | 0.215             | 0.020        | [-1.259, -0.061]           |
|              | IntenSelect | RaySelection          | -0.950                      | 0.215             | <0.001       | [-1.549, -0.350]           |
| User Ranking | Expand      | IntenSelect           | -1.450                      | 0.393             | 0.001        | [-2.590, -0.409]           |
|              | Expand      | LenSelect<br>Combined | -1.850                      | 0.393             | <0.001       | [-2.940, -0.759]           |
|              | Expand      | LenSelect<br>Root     | -1.950                      | 0.393             | <0.001       | [-3.040, -0.859]           |
|              | Expand      | RaySelection          | -1.850                      | 0.393             | <0.001       | [-2.940, -0.759]           |
